# Supplementary material
Source: Springer Nature journal article supplement (https://www.springermedizin.de/resource/supplementary/13756_2013_566_MOESM1_ESM.pdf/9682346)

Thanks to PENICILLIN  
...He Will Come Home!

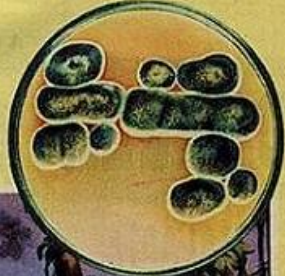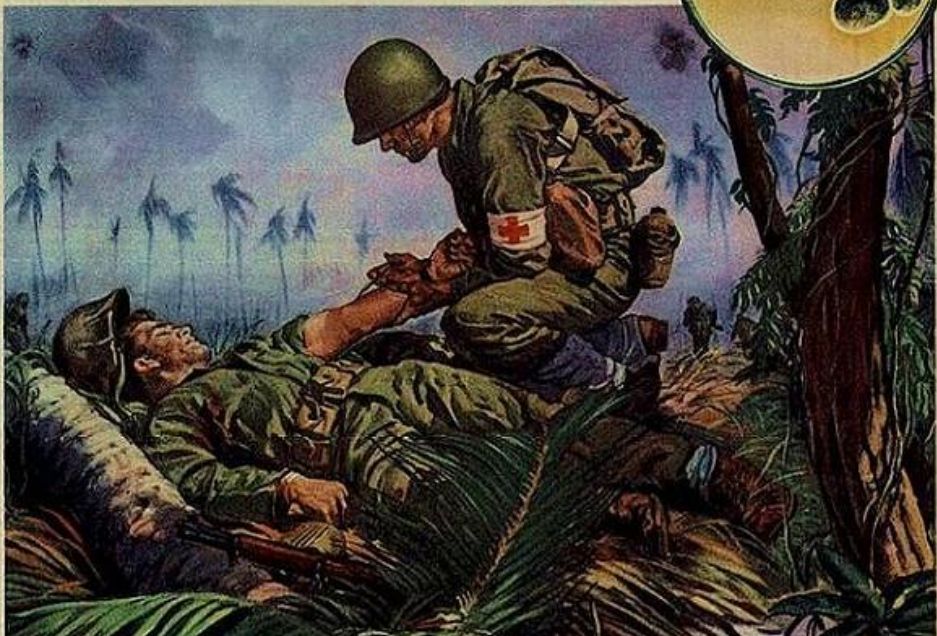

Supplement: MOESM1 [file 9682346]
